# Supplementary material for: Pharmacists’ views and reported practices in relation to a new generic drug substitution policy in Lebanon: a mixed methods study
Source: PubMed Central journal article supplement (PMC5316154; doi:10.1186/s13012-017-0556-1), 2017-02-17
Supplement: 13012_2017_556_MOESM2_ESM.pdf [file 13012_2017_556_MOESM2_ESM.pdf]

Additional file 2: Results of the Full Likert Scale

| Scales and corresponding items                                                                                                | Mean        | Std. Deviation | Strongly Disagree N (%)* | Disagree N (%)*   | Neutral N (%)*    | Agree N (%)*      | Strongly agree N (%)* |
|-------------------------------------------------------------------------------------------------------------------------------|-------------|----------------|--------------------------|-------------------|-------------------|-------------------|-----------------------|
| <b>Attitude towards Generic Drug Substitution (Cronbach's alpha= 0.553)</b>                                                   | <b>3.78</b> | <b>0.85</b>    | <b>8 (2.6)</b>           | <b>41 (13.5)</b>  | <b>35 (11.6)</b>  | <b>145 (47.8)</b> | <b>74 (24.4)</b>      |
| 1. I support generic substitution for all brand name drugs for which generics are available                                   | 3.55        | 1.01           | 4 (2.6)                  | 26 (17.1)         | 25 (16.4)         | 77 (50.7)         | 20 (13.2)             |
| 2. It is acceptable that pharmacists perform generic substitution without obtaining permission from the prescribing physician | 4.01        | 1.03           | 4 (2.6)                  | 15 (9.9)          | 10 (6.6)          | 68 (45)           | 54 (35.8)             |
| <b>Attitude towards Unified Medical Prescription (Cronbach's alpha= 0.529)</b>                                                | <b>3.16</b> | <b>0.77</b>    | <b>65 (10.7)</b>         | <b>145 (23.8)</b> | <b>122 (20.0)</b> | <b>178 (29.2)</b> | <b>99 (16.3)</b>      |
| 1. I support the implementation of the unified medical prescription                                                           | 2.94        | 1.22           | 21 (14.1)                | 37 (24.8)         | 36 (24.2)         | 40 (26.8)         | 15 (10.1)             |
| 2. The unified medical prescription helps promote the use of generic drugs in Lebanon                                         | 3.09        | 1.25           | 19 (12.7)                | 34 (22.7)         | 31 (20.7)         | 47 (31.3)         | 19 (12.7)             |
| 3. The unified medical prescription helps identify physicians who are influenced by medical representatives                   | 3.89        | 1.09           | 5 (3.4)                  | 15 (10.1)         | 22 (14.8)         | 56 (37.6)         | 51 (34.2)             |
| 4. The unified medical prescription helps regulate the pharmaceutical industry                                                | 2.83        | 1.2            | 20 (13.2)                | 59 (32.5)         | 33 (21.9)         | 35 (23.2)         | 14 (9.3)              |
| <b>Layout/structure of Form (Cronbach's alpha= 0.705)</b>                                                                     | <b>3.16</b> | <b>0.77</b>    | <b>30 (9.9)</b>          | <b>58 (19.1)</b>  | <b>78 (25.7)</b>  | <b>127 (41.8)</b> | <b>11 (3.6)</b>       |
| 1. I am satisfied with the overall layout of the form                                                                         | 2.89        | 1.09           | 19 (12.5)                | 38 (25)           | 40 (26.3)         | 51 (33.6)         | 4 (2.6)               |
| 2. The form is user-friendly                                                                                                  | 3.32        | 1.01           | 11 (7.2)                 | 20 (13.2)         | 38 (25)           | 76 (50)           | 7 (4.6)               |
| <b>Pharmacist Practices (Cronbach's alpha= 0.566)</b>                                                                         | <b>3.30</b> | <b>0.64</b>    | <b>46 (6.1)</b>          | <b>140 (18.5)</b> | <b>193 (25.6)</b> | <b>293 (38.8)</b> | <b>83 (11.0)</b>      |
| 1. Pharmacists are adhering to the laws that govern the unified medical prescription.                                         | 2.11        | 1.18           | 7 (4.6)                  | 22 (14.5)         | 33 (21.7)         | 68 (44.7)         | 22 (14.5)             |
| 2. I have substituted brand drugs for generic equivalents in most of the prescriptions I have dispensed (excluding            | 3.04        | 1.14           | 14 (9.3)                 | 39 (25.8)         | 38 (25.2)         | 47 (31.1)         | 13 (8.6)              |

| Scales and corresponding items                                                                                  | Mean | Std. Deviation | Strongly Disagree N (%)* | Disagree N (%)*   | Neutral N (%)*    | Agree N (%)*      | Strongly agree N (%)* |
|-----------------------------------------------------------------------------------------------------------------|------|----------------|--------------------------|-------------------|-------------------|-------------------|-----------------------|
| those prescriptions where the “NS” option was ticked)                                                           |      |                |                          |                   |                   |                   |                       |
| 3. I feel empowered to speak to patients about generic drug substitution since the implementation of the policy | 2.99 | 1.01           | 10 (6.6)                 | 40 (26.5)         | 51 (33.8)         | 42 (27.8)         | 8 (5.3)               |
| 4. I sometimes consult with the physician when I feel the “NS” option is used unjustifiably                     | 3.32 | 1.18           | 12 (7.9)                 | 30 (19.9)         | 27 (17.9)         | 61 (40.4)         | 21 (13.9)             |
| 5. I have been adhering to the Ministry of Public Health’s (MOPH) agreed list of substitutable generic drugs    | 3.65 | 0.85           | 3 (2.0)                  | 9 (6.0)           | 44 (29.3)         | 75 (50)           | 19 (12.7)             |
| <b>MOPH Responsiveness<br/>(Cronbach’s alpha= 0.324)</b>                                                        |      |                | <b>47(7.8)</b>           | <b>128 (21.3)</b> | <b>173 (28.8)</b> | <b>215 (35.8)</b> | <b>38 (6.3)</b>       |
| 1. The MOPH performs regular audits on the prescription forms collected by the pharmacy                         | 3.21 | 1.13           | 17 (11.3)                | 19 (12.7)         | 43 (28.7)         | 58 (38.7)         | 13 (8.7)              |
| 2. Generic drug equivalents approved by the MOPH are almost always in stock                                     | 3.56 | 0.81           | 2 (1.3)                  | 14 (9.3)          | 42 (28.0)         | 82 (54.7)         | 10 (6.7)              |
| 3. The MOPH’s national list of substitutable generic drugs is updated, accessible and easy to use               | 3.18 | 1              | 8 (5.3)                  | 30 (19.7)         | 51 (33.6)         | 53 (34.9)         | 10 (6.6)              |
| 4. The existing price structure discourages me from performing generic drug substitution <sup>†</sup>           | 2.51 | 1.01           | 5 (3.4)                  | 22 (14.8)         | 37 (24.8)         | 65 (43.6)         | 20 (13.4)             |
| <b>Functionality of Form<br/>(Cronbach’s alpha= 0.452)</b>                                                      |      |                | <b>237 (31.4)</b>        | <b>334 (44.3)</b> | <b>88 (11.6)</b>  | <b>66 (8.8)</b>   | <b>29 (3.8)</b>       |
| 1. Physicians are adhering to the laws that govern the unified medical prescription form                        | 2.11 | 1.18           | 57 (38)                  | 51 (34)           | 19 (12.7)         | 15 (10)           | 8 (5.3)               |
| 2. There are technical problems with the implementation of the unified medical prescription form <sup>†</sup>   | 2.14 | 0.9            | 2 (1.3)                  | 15 (9.9)          | 16 (10.5)         | 88 (57.9)         | 31 (20.4)             |
| 3. There are no clear guidelines on how to use the forms <sup>†</sup>                                           | 2.36 | 1.06           | 7 (4.6)                  | 20 (13.2)         | 21 (13.8)         | 77 (50.7)         | 27 (17.8)             |
| 4. Physicians in general are abusing the “NS” option <sup>†</sup>                                               | 1.83 | 0.99           | 5 (3.3)                  | 7 (4.6)           | 12 (7.9)          | 60 (39.7)         | 67 (44.4)             |

| Scales and corresponding items                                                                                                 | Mean        | Std. Deviation | Strongly Disagree N (%)* | Disagree N (%)*   | Neutral N (%)*    | Agree N (%)*      | Strongly agree N (%)* |
|--------------------------------------------------------------------------------------------------------------------------------|-------------|----------------|--------------------------|-------------------|-------------------|-------------------|-----------------------|
| 5. Some patients still show up with the old prescription form                                                                  | 2.03        | 1.08           | 7 (4.7)                  | 9 (6)             | 20 (13.4)         | 58 (38.9)         | 55 (36.9)             |
| <b>Consumer Acceptance<br/>(Cronbach's alpha= 0.472)</b>                                                                       |             |                | <b>73 (12.1)</b>         | <b>231 (38.3)</b> | <b>130 (21.6)</b> | <b>143 (23.7)</b> | <b>26 (4.3)</b>       |
| 1. Consumers generally express negative attitudes towards generic drugs                                                        | 2.61        | 1.13           | 8 (5.3)                  | 31 (20.7)         | 28 (18.7)         | 60 (40.0)         | 23 (15.3)             |
| 2. Consumers are not generally happy with the unified medical prescription                                                     | 2.2         | 0.89           | 2 (1.3)                  | 11 (7.2)          | 34 (22.4)         | 74 (48.7)         | 31 (20.4)             |
| 3. Consumers have been actively requesting generic substitutions for brand name drugs                                          | 2.89        | 1.06           | 12 (7.9)                 | 50 (33.1)         | 39 (25.8)         | 43 (28.5)         | 7 (4.6)               |
| 4. Consumers have accepted most of the substitution suggestions offered by the pharmacy                                        | 3.1         | 1.06           | 7 (4.7)                  | 47 (31.3)         | 29 (19.3)         | 58 (38.7)         | 9 (6.0)               |
| <b>Relation with Drug Companies<br/>(Cronbach's alpha= 0.629)</b>                                                              | <b>2.76</b> | <b>0.92</b>    | <b>36 (12.0)</b>         | <b>104 (34.7)</b> | <b>68 (22.7)</b>  | <b>81 (27.0)</b>  | <b>11(3.7)</b>        |
| 1. My drug substitution choice is influenced by information from medical drug representatives                                  | 2.6         | 1.01           | 19 (12.6)                | 60 (39.7)         | 36 (23.8)         | 34 (22.5)         | 2 (1.3)               |
| 2. It is acceptable that pharmacists rely on medical drug representatives to learn about alternative drug substitutions        | 2.91        | 1.15           | 17 (11.4)                | 44 (29.5)         | 32 (21.5)         | 47 (31.5)         | 9 (6.0)               |
| <b>Outcome of the Policy<br/>(Cronbach's alpha= 0.511)</b>                                                                     | <b>2.67</b> | <b>0.61</b>    | <b>95 (12.5)</b>         | <b>282 (37.2)</b> | <b>188 (24.8)</b> | <b>161 (21.2)</b> | <b>32 (4.2)</b>       |
| 1. The number of generic dispensing at my pharmacy has increased considerably since the implementation of the policy           | 2.59        | 0.97           | 16 (10.5)                | 65 (42.8)         | 39 (25.7)         | 30 (19.7)         | 2 (1.3)               |
| 2. There was an initial peak in generic dispensing following the implementation of the policy that was subsequently attenuated | 2.72        | 1.02           | 14 (9.2)                 | 59 (38.8)         | 39 (25.7)         | 35 (23)           | 5 (3.3)               |
| 3. The overall patient expenditure on medicine has decreased since the implementation of the policy                            | 2.86        | 1.09           | 12 (7.9)                 | 57 (37.5)         | 31 (20.4)         | 44( 28.9)         | 8 (5.3)               |
| 4. There has been a noticeable shift in pharmaceutical companies' promotional                                                  | 2.97        | 1.05           | 10 (6.6)                 | 43 (28.3)         | 53 (34.9)         | 34 (22.4)         | 12 (7.9)              |

| Scales and corresponding items                                                                                                             | Mean | Std. Deviation | Strongly Disagree N (%) <sup>*</sup> | Disagree N (%) <sup>*</sup> | Neutral N (%) <sup>*</sup> | Agree N (%) <sup>*</sup> | Strongly agree N (%) <sup>*</sup> |
|--------------------------------------------------------------------------------------------------------------------------------------------|------|----------------|--------------------------------------|-----------------------------|----------------------------|--------------------------|-----------------------------------|
| 5. strategies targeting pharmacists<br>The policy is creating conflicts between the physician, the pharmacist and the patient <sup>r</sup> | 3.77 | 1.09           | 5 (3.3)                              | 18 (12.0)                   | 26 (17.3)                  | 58 (38.7)                | 43 (28.7)                         |

<sup>\*</sup>All percentages have been rounded to one decimal point  
<sup>r</sup>reverse scores
