# Supplementary material for: Pharmacists’ views and reported practices in relation to a new generic drug substitution policy in Lebanon: a mixed methods study
Source: PubMed Central journal article supplement (PMC5316154; doi:10.1186/s13012-017-0556-1), 2017-02-17
Supplement: 13012_2017_556_MOESM3_ESM.pdf [file 13012_2017_556_MOESM3_ESM.pdf]

Additional file 3: Questionnaire distribution by governorate and response rates

| <b>Governorate</b>                                    | <b>Number of pharmacies approached</b> | <b>Number of respondents</b> | <b>Percent response rate*</b> |
|-------------------------------------------------------|----------------------------------------|------------------------------|-------------------------------|
| Beirut                                                | 40                                     | 31                           | 78%                           |
| Bekaa                                                 | 34                                     | 22                           | 65%                           |
| Mount Lebanon                                         | 32                                     | 27                           | 84%                           |
| North                                                 | 37                                     | 29                           | 78%                           |
| Nabatiye                                              | 31                                     | 21                           | 68%                           |
| South Lebanon                                         | 30                                     | 23                           | 77%                           |
| <b>Total</b>                                          | <b>204</b>                             | <b>153</b>                   | <b>75%</b>                    |
| *All percentages have been rounded to the nearest one |                                        |                              |                               |
