# Supplementary material for: Pharmacists’ views and reported practices in relation to a new generic drug substitution policy in Lebanon: a mixed methods study
Source: PubMed Central journal article supplement (PMC5316154; doi:10.1186/s13012-017-0556-1), 2017-02-17
Supplement: 13012_2017_556_MOESM4_ESM.pdf [file 13012_2017_556_MOESM4_ESM.pdf]

Additional file 4: ANOVA and T-tests results \*

|                                                                | Pharmacist attitude towards generic drug substitution | Pharmacist attitude towards unified medical prescription | Layout/ structure of form | Outcome of policy | Relation with drug company | Functionality of form | Consumer acceptance | Pharmacist practices | MOPH Responsiveness |
|----------------------------------------------------------------|-------------------------------------------------------|----------------------------------------------------------|---------------------------|-------------------|----------------------------|-----------------------|---------------------|----------------------|---------------------|
|                                                                | Mean** (SD)                                           | Mean (SD)                                                | Mean (SD)                 | Mean (SD)         | Mean (SD)                  | Mean (SD)             | Mean (SD)           | Mean (SD)            | Mean (SD)           |
| <b>Gender</b>                                                  |                                                       |                                                          |                           |                   |                            |                       |                     |                      |                     |
| Male                                                           | <b>3.96 (0.85)</b>                                    | 3.27 (0.81)                                              | 3.13 (0.83)               | 2.91 (0.65)       | 2.70 (0.94)                | 2.53 (0.56)           | 2.76 (0.64)         | 3.28 (0.65)          | 3.13 (0.54)         |
| N***                                                           | 74                                                    | 72                                                       | 75                        | 74                | 73                         | 75                    | 74                  | 74                   | 71                  |
| Female                                                         | 3.57 (0.81)                                           | 3.03 (0.69)                                              | 3.06 (1.02)               | 3.02 (0.62)       | 2.8 (0.93)                 | 2.41 (0.41)           | 2.63 (0.65)         | 3.29 (0.63)          | 3.08 (0.60)         |
| N                                                              | 72                                                    | 67                                                       | 72                        | 71                | 70                         | 67                    | 68                  | 71                   | 69                  |
| P-value                                                        | <b>0.005</b>                                          | 0.059                                                    | 0.614                     | 0.291             | 0.488                      | 0.155                 | 0.229               | 0.912                | 0.603               |
| <b>Postgraduate Qualification (PharmD)</b>                     |                                                       |                                                          |                           |                   |                            |                       |                     |                      |                     |
| Yes                                                            | 3.84 (0.85)                                           | 3.05 (0.82)                                              | 2.74 (1.05)               | 3.08 (0.65)       | 2.78 (0.98)                | 2.39 (0.50)           | 2.65 (0.65)         | 3.37 (0.64)          | 3.02 (0.64)         |
| N                                                              | 56                                                    | 55                                                       | 57                        | 56                | 56                         | 56                    | 56                  | 57                   | 56                  |
| No                                                             | 3.74 (0.86)                                           | 3.22 (0.73)                                              | <b>3.30 (0.76)</b>        | 2.90 (0.63)       | 2.73 (0.90)                | 2.51 (0.48)           | 2.74 (0.66)         | 3.25 (0.64)          | 3.16 (0.53)         |
| N                                                              | 92                                                    | 86                                                       | 92                        | 91                | 90                         | 87                    | 88                  | 90                   | 87                  |
| P-value                                                        | 0.491                                                 | 0.192                                                    | <b>0.001</b>              | 0.105             | 0.784                      | 0.161                 | 0.438               | 0.272                | 0.146               |
| <b>Received teaching about generic versus brand name drugs</b> |                                                       |                                                          |                           |                   |                            |                       |                     |                      |                     |
| Yes                                                            | 3.74 (0.88)                                           | <b>3.25 (0.78)</b>                                       | 2.98 (0.95)               | 3.00 (0.6)        | 2.78 (0.95)                | 2.47 (0.53)           | 2.69 (0.67)         | <b>3.41 (0.63)</b>   | 3.08 (0.61)         |
| N                                                              | 84                                                    | 81                                                       | 84                        | 83                | 83                         | 80                    | 81                  | 83                   | 79                  |

|                        | Pharmacist attitude towards generic drug substitution | Pharmacist attitude towards unified medical prescription | Layout/ structure of form | Outcome of policy | Relation with drug company | Functionality of form | Consumer acceptance     | Pharmacist practices | MOPH Responsiveness          |
|------------------------|-------------------------------------------------------|----------------------------------------------------------|---------------------------|-------------------|----------------------------|-----------------------|-------------------------|----------------------|------------------------------|
|                        | Mean** (SD)                                           | Mean (SD)                                                | Mean (SD)                 | Mean (SD)         | Mean (SD)                  | Mean (SD)             | Mean (SD)               | Mean (SD)            | Mean (SD)                    |
| No                     | 3.88 (0.77)                                           | 2.93 (0.70)                                              | <b>3.41 (0.81)</b>        | 2.87 (0.48)       | 2.70 (0.85)                | 2.43 (0.36)           | 2.7 (0.60)              | 2.96 (0.50)          | 3.16 (0.45)                  |
| N                      | 67                                                    | 62                                                       | 68                        | 67                | 65                         | 66                    | 66                      | 67                   | 66                           |
| P-value                | 0.17                                                  | <b>0.035</b>                                             | <b>0.013</b>              | 0.232             | 0.681                      | 0.576                 | 0.892                   | <b>&lt;0.001</b>     | 0.441                        |
| <b>Governorate****</b> |                                                       |                                                          |                           |                   |                            |                       |                         |                      |                              |
| Beirut                 | 3.66 (0.72)                                           | 3.06 (0.75)                                              | 2.97 (0.88)               | 2.92 (0.60)       | 2.83 (0.88)                | 2.49 (0.55)           | 2.44 (0.53)a            | 3.37 (0.60)          | 3.01 (0.55)a                 |
| N                      | 31                                                    | 28                                                       | 31                        | 31                | 30                         | 30                    | 29                      | 30                   | 31                           |
| Mount Lebanon          | 3.89 (0.82)                                           | 2.94 (0.53)                                              | 3.24 (0.93)               | 2.98 (0.59)       | 2.37 (0.79)                | 2.42 (0.66)           | 2.86 (0.54)             | 3.04 (0.53)          | 3.27 (0.48)                  |
| N                      | 22                                                    | 22                                                       | 23                        | 23                | 23                         | 22                    | 22                      | 23                   | 23                           |
| North Lebanon          | 3.73 (1.00)                                           | 3.48 (0.92)                                              | 3.13 (0.80)               | 2.93 (0.62)       | 2.90 (0.88)                | 2.3852 (0.44002)      | 2.51 (0.59)b            | 3.26 (0.70)          | 3.04 (0.58)b                 |
| N                      | 28                                                    | 24                                                       | 28                        | 27                | 26                         | 27                    | 27                      | 28                   | 27                           |
| Beqaa                  | 3.96 (1.01)                                           | 3.18 (0.84)                                              | 3.21 (0.95)               | 2.88 (0.60)       | 2.58 (1.01)                | 2.45 (0.35)           | 2.82 (0.67)             | 3.17 (0.57)          | 3.03 (0.46)c                 |
| N                      | 26                                                    | 26                                                       | 26                        | 26                | 26                         | 26                    | 26                      | 26                   | 24                           |
| South Lebanon          | 3.67 (0.68)                                           | 3.26 (0.68)                                              | 3.39 (0.80)               | 3.14 (0.70)       | 3.11(0.89)                 | 2.56 (0.29)           | <b>3.09 (0.69) a, b</b> | 3.6 (0.64734)        | <b>3.55 (0.58)a, b, c, d</b> |
| N                      | 23                                                    | 22                                                       | 23                        | 22                | 22                         | 21                    | 22                      | 22                   | 21                           |
| Nabatieh               | 3.79 (0.85)                                           | 3.00 (0.72)                                              | 2.67 (1.11)               | 3.07 (0.79)       | 2.74 (1.01)                | 2.51 (0.62)           | 2.61 (0.71)             | 3.38 (0.69)          | 2.80 (0.56)d                 |
| N                      | 21                                                    | 21                                                       | 21                        | 21                | 21                         | 20                    | 21                      | 21                   | 19                           |
| P-value                | 0.770                                                 | 0.171                                                    | 0.128                     | 0.739             | 0.100                      | 0.856                 | <b>0.003</b>            | 0.059                | <b>&lt;0.001</b>             |

|                            | Pharmacist attitude towards generic drug substitution | Pharmacist attitude towards unified medical prescription | Layout/ structure of form | Outcome of policy | Relation with drug company | Functionality of form | Consumer acceptance | Pharmacist practices | MOPH Responsiveness |
|----------------------------|-------------------------------------------------------|----------------------------------------------------------|---------------------------|-------------------|----------------------------|-----------------------|---------------------|----------------------|---------------------|
|                            | Mean** (SD)                                           | Mean (SD)                                                | Mean (SD)                 | Mean (SD)         | Mean (SD)                  | Mean (SD)             | Mean (SD)           | Mean (SD)            | Mean (SD)           |
| <b>Years of experience</b> |                                                       |                                                          |                           |                   |                            |                       |                     |                      |                     |
| Less than 10 years         | 3.76 (0.83)                                           | 3.16 (0.68)                                              | 2.98 (0.93)               | 3.02 (0.60)       | 2.75 (0.93)                | 2.42 (0.48)           | 2.65 (0.61)         | 3.21 (0.62)          | 3.00 (0.58)         |
| N                          | 84                                                    | 81                                                       | 84                        | 83                | 83                         | 80                    | 81                  | 83                   | 79                  |
| More than 10 years         | 3.80 (0.87)                                           | 3.15 (0.87)                                              | 3.26 (0.89)               | 2.93 (0.69)       | 2.77 (0.93)                | 2.53 (0.50)           | 2.78 (0.69)         | <b>3.41 (0.64)</b>   | <b>3.25 (0.54)</b>  |
| N                          | 67                                                    | 62                                                       | 68                        | 67                | 65                         | 66                    | 66                  | 67                   | 66                  |
| P-value                    | 0.794                                                 | 0.915                                                    | 0.061                     | 0.388             | 0.885                      | 0.182                 | 0.223               | <b>0.049</b>         | <b>0.009</b>        |

\* Results are shown for only the variables with significant association to any of the scales

\*\* Scores range from 1 to 5 for each scale, with higher scores signifying higher agreement to the item being assessed.

\*\*\* N= sample size

\*\*\*\*ANOVA test was conducted, values that have the same letter denote significant differences
