# Supplementary material for: Pharmacists’ views and reported practices in relation to a new generic drug substitution policy in Lebanon: a mixed methods study
Source: PubMed Central journal article supplement (PMC5316154; doi:10.1186/s13012-017-0556-1), 2017-02-17
Supplement: 13012_2017_556_MOESM5_ESM.pdf [file 13012_2017_556_MOESM5_ESM.pdf]

Additional file 5: Barriers and strategies to facilitate implementation of the generic drug substitution policy, as perceived by respondents

| Level              | Perceived Barriers                                                                                                                                                        | Suggested strategies to overcome barriers                                                                                                                                                                                                                                                                                                                                                                                                                                                                                                              |
|--------------------|---------------------------------------------------------------------------------------------------------------------------------------------------------------------------|--------------------------------------------------------------------------------------------------------------------------------------------------------------------------------------------------------------------------------------------------------------------------------------------------------------------------------------------------------------------------------------------------------------------------------------------------------------------------------------------------------------------------------------------------------|
| <b>Physicians</b>  | Overuse by physicians of the ‘non-substitutable’ option for “unjustified” reasons including for drugs that are not available in the market                                | <ul style="list-style-type: none"> <li>- Cancel the NS option</li> <li>- Educate physicians on the purpose of the NS option and the need to respect its use</li> <li>- Encourage physicians to take into account the economic condition of patient when prescribing the medicine</li> <li>- Establish a limit on the minimum permissible number of NS that can be written by a physician per month.</li> </ul>                                                                                                                                         |
|                    | Continued use of the old form by physicians, especially for patients who are uninsured or who have private insurance<br><br>Physicians charging patients for the new form | <ul style="list-style-type: none"> <li>- Persuade physicians to use the new form and circulate reminders</li> <li>- Prosecute physicians who refuse to use the new form</li> <li>- Facilitate availability and access to form</li> <li>- Distribute form free of charge</li> <li>- Prosecute physicians who charge patients for the form.</li> </ul>                                                                                                                                                                                                   |
|                    | Physicians’ interactions with the pharmaceutical industry                                                                                                                 | <ul style="list-style-type: none"> <li>- Restrict interactions between physicians and pharmaceutical companies</li> <li>- Impose fines on doctors who accept bribery to prescribe certain drugs</li> <li>- Raise awareness among physicians on the effects of physician-industry interactions on their behaviors</li> </ul>                                                                                                                                                                                                                            |
|                    | Insufficient awareness of physicians of the importance of applying the policy as well as the rules that govern it                                                         | <ul style="list-style-type: none"> <li>- Organize seminars and conferences to all concerned parties including physicians and hospital directors, to explain the goals of the policy and clarify the duties, rights and expectations from each party.</li> </ul>                                                                                                                                                                                                                                                                                        |
|                    | Errors and omissions when filling prescription form as well as incorrect stamping of form                                                                                 | <ul style="list-style-type: none"> <li>- Simplify the form layout and requirements</li> </ul>                                                                                                                                                                                                                                                                                                                                                                                                                                                          |
| <b>Pharmacists</b> | Lack of support by pharmacists for the new policy<br><br>Poor commitment of pharmacists to the new prescription form with continued acceptance of old form                | <ul style="list-style-type: none"> <li>- Organize seminars and conferences to all concerned parties including pharmacists to explain the goals of the policy and clarify the duties, rights and expectations from each party</li> <li>- Mainstream role of pharmacist to be recognized by all physician</li> <li>- Empower pharmacists and grant them the right to perform drug substitution if deemed necessary without referring to physician</li> <li>- Issue a full list of over-the-counter drugs by the MOPH that can be disbursed by</li> </ul> |

| Level                 | Perceived Barriers                                                                                                                           | Suggested strategies to overcome barriers                                                                                                                                                                                                     |
|-----------------------|----------------------------------------------------------------------------------------------------------------------------------------------|-----------------------------------------------------------------------------------------------------------------------------------------------------------------------------------------------------------------------------------------------|
|                       |                                                                                                                                              | pharmacists to the patient without a prescription form.<br>- Clarify the law to regulate the operations of replacement medication.                                                                                                            |
|                       | Lack of incentives to perform generic substitution                                                                                           | - Provide compensation for pharmacists for their losses because of the reduction in the prices of medicines.<br>- Establish incentive systems to promote generic substitution                                                                 |
|                       | Administrative burden with processing the form with subsequent rejections                                                                    | - Reduce administrative burden and provide some flexibility when processing the form                                                                                                                                                          |
|                       | Pharmacists' lack of awareness of the existence of a national list of approved substitutable drugs on the MOPH website                       | - Raise awareness of pharmacists and involve them in the decision-making process                                                                                                                                                              |
| <b>Consumers</b>      | Poor awareness and education of consumer about generic drugs and the unified medical prescription                                            | - Leverage on different media channels to promote the new policy                                                                                                                                                                              |
|                       | Resistance of consumers to generic drugs and generic substitution                                                                            | - Conduct awareness campaigns to raise the awareness of consumer about generic drugs and the unified medical prescription.<br>- Third party payers to promote generic substitution by disbursing only generic equivalents of brand name drugs |
|                       | Lack of trust in pharmacists and preference to purchase the exact medication prescribed by physicians                                        | - Through emphasizing the important role of pharmacist in ensuring the quality and safety of medications                                                                                                                                      |
| <b>Organizational</b> | Poor adherence of hospitals and dispensaries to the new policy                                                                               | - Ensure the full commitment of hospitals and dispensaries to the new policy                                                                                                                                                                  |
|                       | Some hospitals charge patients for the new form                                                                                              | - Prosecute entities who refrain from its proper use including those that charge patients for the form.                                                                                                                                       |
| <b>System</b>         | Absence of mechanisms to monitor prescribing patterns                                                                                        | - Computerize prescription forms to allow ongoing and timely surveillance<br>- Adopt magnetic cards to facilitate monitoring of drug prescription patterns                                                                                    |
|                       | Poor enforcement systems in place                                                                                                            | - Periodic inspections of physicians and pharmacists and dispensaries by the ministry of public health to ensure they are abiding by the policy<br>- Prosecution of, and imposition of fines on entities that violate the rules               |
|                       | Challenging financial and economic situations that affect some patients' ability to afford consultation fees whenever they want a medication | - Restructure the health care system to ensure free medical services to all citizens<br>- Subsidize consultation fees for poor<br>- Ensure funds to aid the sick                                                                              |
|                       | Lack of universal health coverage which may hinder consumer access to medication                                                             | - Accelerate progress to universal health coverage                                                                                                                                                                                            |

| Level | Perceived Barriers                                                                                                               | Suggested strategies to overcome barriers                                                                                                                                                                                                                                                                               |
|-------|----------------------------------------------------------------------------------------------------------------------------------|-------------------------------------------------------------------------------------------------------------------------------------------------------------------------------------------------------------------------------------------------------------------------------------------------------------------------|
|       |                                                                                                                                  | <ul style="list-style-type: none"> <li>- Expand National Social Security Funds (NSSF) beneficiaries (respondents claimed that doctors/organizations tend to use new form with NSSF patients)</li> </ul>                                                                                                                 |
|       | Delays from insurance companies in processing payment of bills related to medicines disbursed according to new prescription form | <ul style="list-style-type: none"> <li>- NSSF to accelerate processing payment of bills related to drugs disbursed according to prescription form.</li> </ul>                                                                                                                                                           |
|       | Lack of collection of forms by the MOPH resulting in piling up of paperwork at pharmacies                                        | <ul style="list-style-type: none"> <li>- Switch to electronic version that is simple, less time consuming, printable and for free</li> </ul>                                                                                                                                                                            |
|       | Price of several brand name drugs is similar to their generic alternatives, thus discouraging generic substitution               | <ul style="list-style-type: none"> <li>- Impose appropriate pricing policies that create a competitive market for generic drugs</li> </ul>                                                                                                                                                                              |
|       | Poor trust of pharmacists, physicians and patients in quality and effectiveness of all generic drugs available in market         | <ul style="list-style-type: none"> <li>- MOPH to ensure quality of marketed generic drugs through interventions such as: (1) mandatory quality and bioequivalence testing of generic drugs; (2) requirement for approval of generic drugs by international organizations such as FDA, EMA, and Canadian ones</li> </ul> |
|       | Insufficient quantities of alternative medicines which hinder their ability to perform substitutions                             | <ul style="list-style-type: none"> <li>- Expand the list of alternative generic medicines</li> <li>- Do not register new brands without specifying number of equivalent generics for that brand</li> </ul>                                                                                                              |
|       | Prescription form does not cover army and dental services                                                                        | <ul style="list-style-type: none"> <li>- Expand the scope of the policy</li> </ul>                                                                                                                                                                                                                                      |
|       | Absence of regulations on pharmaceutical industry's interactions with health care professionals                                  | <ul style="list-style-type: none"> <li>- Restrictive policies preventing certain types of interactions and limiting others</li> <li>- Disclosure of interactions to the public</li> </ul>                                                                                                                               |
